# Supplementary material for: Machine learning based differentiation of glioblastoma from brain metastasis using MRI derived radiomics
Source: PubMed Central journal article supplement (PMC8131619; doi:10.1038/s41598-021-90032-w), 2021-05-18
Supplement: 41598_2021_90032_MOESM1_ESM.pdf [file 41598_2021_90032_MOESM1_ESM.pdf]

## **TITLE Page**

### **Machine Learning based Differentiation of Glioblastoma from Brain Metastasis using MRI derived Radiomics**

#### **Author names and affiliations**

Sarv Priya<sup>1</sup>, MBBS

Yanan Liu<sup>2</sup>, PhD

Caitlin Ward<sup>3</sup>, MS

Nam H Le<sup>2</sup> MS

Neetu Soni<sup>1</sup> MD

Ravishankar Pillenahalli Maheshwarappa<sup>1</sup> MD

Varun Monga<sup>4</sup>, MD

Honghai Zhang<sup>2</sup>, PhD

Milan Sonka<sup>2</sup>, PhD

Girish Bathla<sup>1</sup> MBBS, FRCR

1: Department of Radiology, University of Iowa Hospitals and Clinics, Iowa City, IA, USA

2: College of Engineering, University of Iowa, Iowa City, IA, USA

3: Department of Biostatistics, University of Iowa, Iowa City, IA, USA

4: Department of Medicine, University of Iowa Hospitals and Clinics, Iowa City, IA, USA

**Type of manuscript:** Original research

#### **Correspondence:**

Sarv Priya MD

Department of Radiology,

University of Iowa Hospital and Clinics,

200 Hawkins Drive

Iowa City, IA, 52242

E-mail: sarv-priya@uiowa.edu

Phone: 319-512-5404

**Supplementary Table S1: Ranking by variable Importance for the 10 most important features in the two best models fit using all sequences**

| <b>LASSO Full Feature set</b>       |             |            |                                           |                            |
|-------------------------------------|-------------|------------|-------------------------------------------|----------------------------|
| <b>Rank</b>                         | <b>Mask</b> | <b>Seq</b> | <b>Feature</b>                            | <b>Relative Importance</b> |
| 1                                   | WT          | F          | shape_Sphericity                          | 100.00                     |
| 2                                   | WT          | T2         | Maximum2DDiameterRow                      | 49.63                      |
| 3                                   | WT          | CE         | firstorder_Skewness                       | 39.31                      |
| 4                                   | WT          | T1         | gldm_SmallDependenceHighGrayLevelEmphasis | 34.16                      |
| 5                                   | Edema       | A          | ngtdm_Contrast                            | 31.87                      |
| 6                                   | Edema       | F          | shape_Sphericity                          | 26.28                      |
| 7                                   | Edema       | T1         | firstorder_10Percentile                   | 17.36                      |
| 8                                   | WT          | T1         | shape_LeastAxisLength                     | 17.04                      |
| 9                                   | WT          | F          | firstorder_RobustMeanAbsoluteDeviation    | 16.14                      |
| 10                                  | Edema       | T2         | shape_LeastAxisLength                     | 12.70                      |
| <b>Elastic Net Full Feature set</b> |             |            |                                           |                            |
| <b>Rank</b>                         | <b>Mask</b> | <b>Seq</b> | <b>Feature</b>                            | <b>Relative Importance</b> |
| 1                                   | WT          | F          | shape_Sphericity                          | 100.00                     |
| 2                                   | WT          | CE         | firstorder_Skewness                       | 24.24                      |
| 3                                   | Edema       | A          | ngtdm_Contrast                            | 24.02                      |
| 4                                   | Edema       | F          | shape_Sphericity                          | 21.67                      |
| 5                                   | WT          | T2         | firstorder_InterquartileRange             | 19.66                      |
| 6                                   | Edema       | A          | Maximum2DDiameterRow                      | 18.36                      |
| 7                                   | WT          | T1         | gldm_SmallDependenceHighGrayLevelEmphasis | 18.16                      |
| 8                                   | WT          | T2         | glcm_Correlation                          | 17.79                      |
| 9                                   | WT          | F          | firstorder_RobustMeanAbsoluteDeviation    | 17.35                      |
| 10                                  | Edema       | T1         | firstorder_Kurtosis                       | 13.28                      |

*WT: Whole tumor mask; A: ADC; F: FLAIR; CE: T1-CE*

**Supplementary Figure 1: Feature ranking for the 10 most important features in the two best models fit using all sequences**

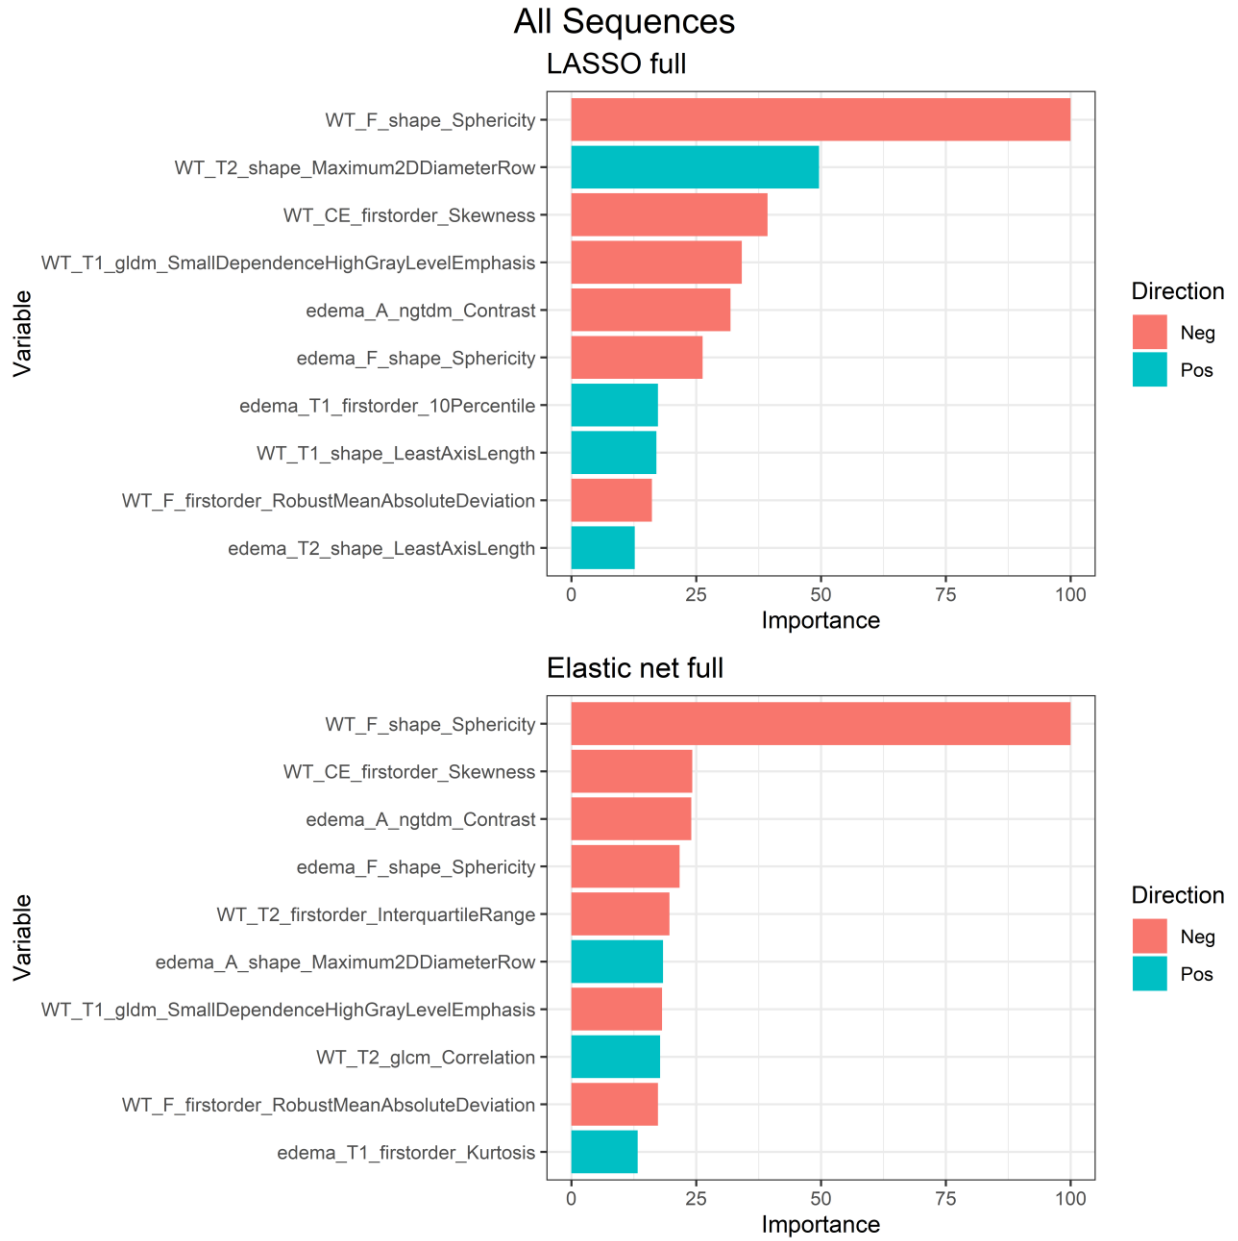

*Positive (Pos) association indicates that larger value of that feature is associated with GBM and a negative (Neg) value indicates that smaller values of that feature are associated with GBM (i.e. larger values are associated with metastasis).*

**Supplementary Table S2: Ranking by variable Importance for the 10 most important features in the two best models fit using individual sequences**

| <b>LASSO Full Feature set FLAIR</b>       |             |                                          |                            |
|-------------------------------------------|-------------|------------------------------------------|----------------------------|
| <b>Rank</b>                               | <b>Mask</b> | <b>Feature</b>                           | <b>Relative Importance</b> |
| 1                                         | WT          | shape_Sphericity                         | 100.00                     |
| 2                                         | Edema       | Maximum2DDiameterRow                     | 38.46                      |
| 3                                         | Edema       | firstorder_InterquartileRange            | 33.00                      |
| 4                                         | Edema       | glszm_SmallAreaHighGrayLevelEmphasis     | 31.07                      |
| 5                                         | WT          | glszm_SmallAreaHighGrayLevelEmphasis     | 26.64                      |
| 6                                         | Edema       | firstorder_RobustMeanAbsoluteDeviation   | 21.92                      |
| 7                                         | WT          | firstorder_RobustMeanAbsoluteDeviation   | 19.74                      |
| 8                                         | Edema       | gldm_LargeDependenceLowGrayLevelEmphasis | 16.80                      |
| 9                                         | WT          | firstorder_TotalEnergy                   | 14.84                      |
| 10                                        | WT          | glrlm_ShortRunHighGrayLevelEmphasis      | 11.75                      |
| <b>Elastic Net Full Feature set FLAIR</b> |             |                                          |                            |
| <b>Rank</b>                               | <b>Mask</b> | <b>Feature</b>                           | <b>Relative Importance</b> |
| 1                                         | WT          | shape_Sphericity                         | 100.00                     |
| 2                                         | Edema       | Maximum2DDiameterRow                     | 38.46                      |
| 3                                         | Edema       | firstorder_InterquartileRange            | 33.00                      |
| 4                                         | Edema       | glszm_SmallAreaHighGrayLevelEmphasis     | 31.07                      |
| 5                                         | WT          | glszm_SmallAreaHighGrayLevelEmphasis     | 26.64                      |
| 6                                         | Edema       | firstorder_RobustMeanAbsoluteDeviation   | 21.92                      |
| 7                                         | WT          | firstorder_RobustMeanAbsoluteDeviation   | 19.74                      |
| 8                                         | Edema       | gldm_LargeDependenceLowGrayLevelEmphasis | 16.80                      |
| 9                                         | WT          | firstorder_TotalEnergy                   | 14.84                      |
| 10                                        | WT          | glrlm_ShortRunHighGrayLevelEmphasis      | 11.75                      |

*WT: Whole tumor mask*

**Supplementary Figure 2: Feature ranking for the 10 most important features in the two best models fit using individual sequences**

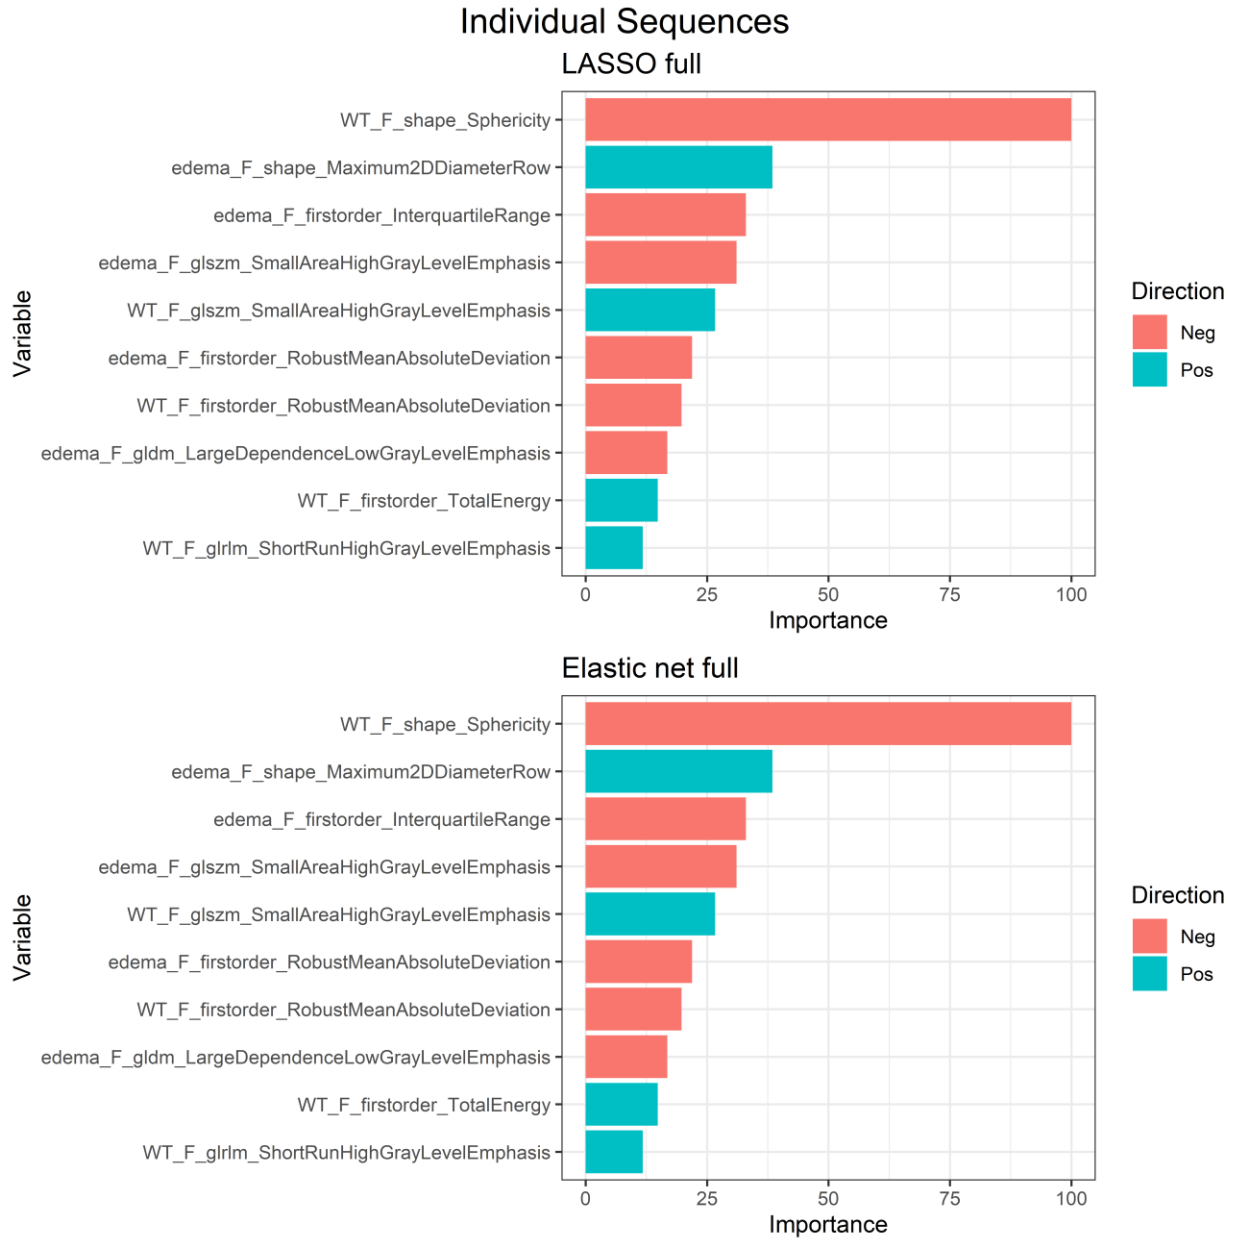

*Positive (Pos) association indicates that larger value of that feature is associated with GBM and a negative (Neg) value indicates that smaller values of that feature are associated with GBM (i.e. larger values are associated with metastasis).*

**Supplementary Table S3: Ranking by variable Importance for the 10 most important features in the two best models fit using T1-CE and FLAIR sequences**

| <b>adaBoost Full T1 CE+F</b> |             |            |                                           |                            |
|------------------------------|-------------|------------|-------------------------------------------|----------------------------|
| <b>Rank</b>                  | <b>Mask</b> | <b>Seq</b> | <b>Feature</b>                            | <b>Relative Importance</b> |
| 1                            | WT          | F          | shape_Sphericity                          | 100.00                     |
| 2                            | Edema       | F          | gldm_LargeDependenceHighGrayLevelEmphasis | 92.81                      |
| 3                            | WT          | F          | glrlm_LongRunEmphasis                     | 43.11                      |
| 4                            | WT          | F          | firstorder_TotalEnergy                    | 39.19                      |
| 5                            | WT          | CE         | glcm_Imc1                                 | 39.11                      |
| 6                            | WT          | F          | shape_MajorAxisLength                     | 31.76                      |
| 7                            | WT          | CE         | glszm_SmallAreaEmphasis                   | 31.03                      |
| 8                            | Edema       | CE         | glcm_Contrast                             | 28.13                      |
| 9                            | Edema       | CE         | shape_Maximum2DDiameterRow                | 25.58                      |
| 10                           | WT          | F          | gldm_SmallDependenceEmphasis              | 25.44                      |
| <b>LASSO Full T1 CE+F</b>    |             |            |                                           |                            |
| <b>Rank</b>                  | <b>Mask</b> | <b>Seq</b> | <b>Feature</b>                            | <b>Relative Importance</b> |
| 1                            | WT          | F          | shape_Sphericity                          | 100.00                     |
| 2                            | Edema       | CE         | shape_Maximum2DDiameterRow                | 40.61                      |
| 3                            | Edema       | F          | glszm_SmallAreaHighGrayLevelEmphasis      | 34.69                      |
| 4                            | Edema       | F          | firstorder_InterquartileRange             | 30.52                      |
| 5                            | WT          | CE         | firstorder_Skewness                       | 30.31                      |
| 6                            | Edema       | F          | shape_Sphericity                          | 20.48                      |
| 7                            | WT          | CE         | glszm_SmallAreaEmphasis                   | 20.34                      |
| 8                            | WT          | F          | firstorder_RobustMeanAbsoluteDeviation    | 19.99                      |
| 9                            | WT          | CE         | ngtdm_Busyness                            | 17.83                      |
| 10                           | Edema       | F          | firstorder_RobustMeanAbsoluteDeviation    | 12.91                      |

*WT: Whole tumor mask; A: ADC; F: FLAIR; CE: T1-CE*

**Supplementary Figure 3: Feature ranking for the 10 most important features in the two best models fit using T1-CE and FLAIR sequences**

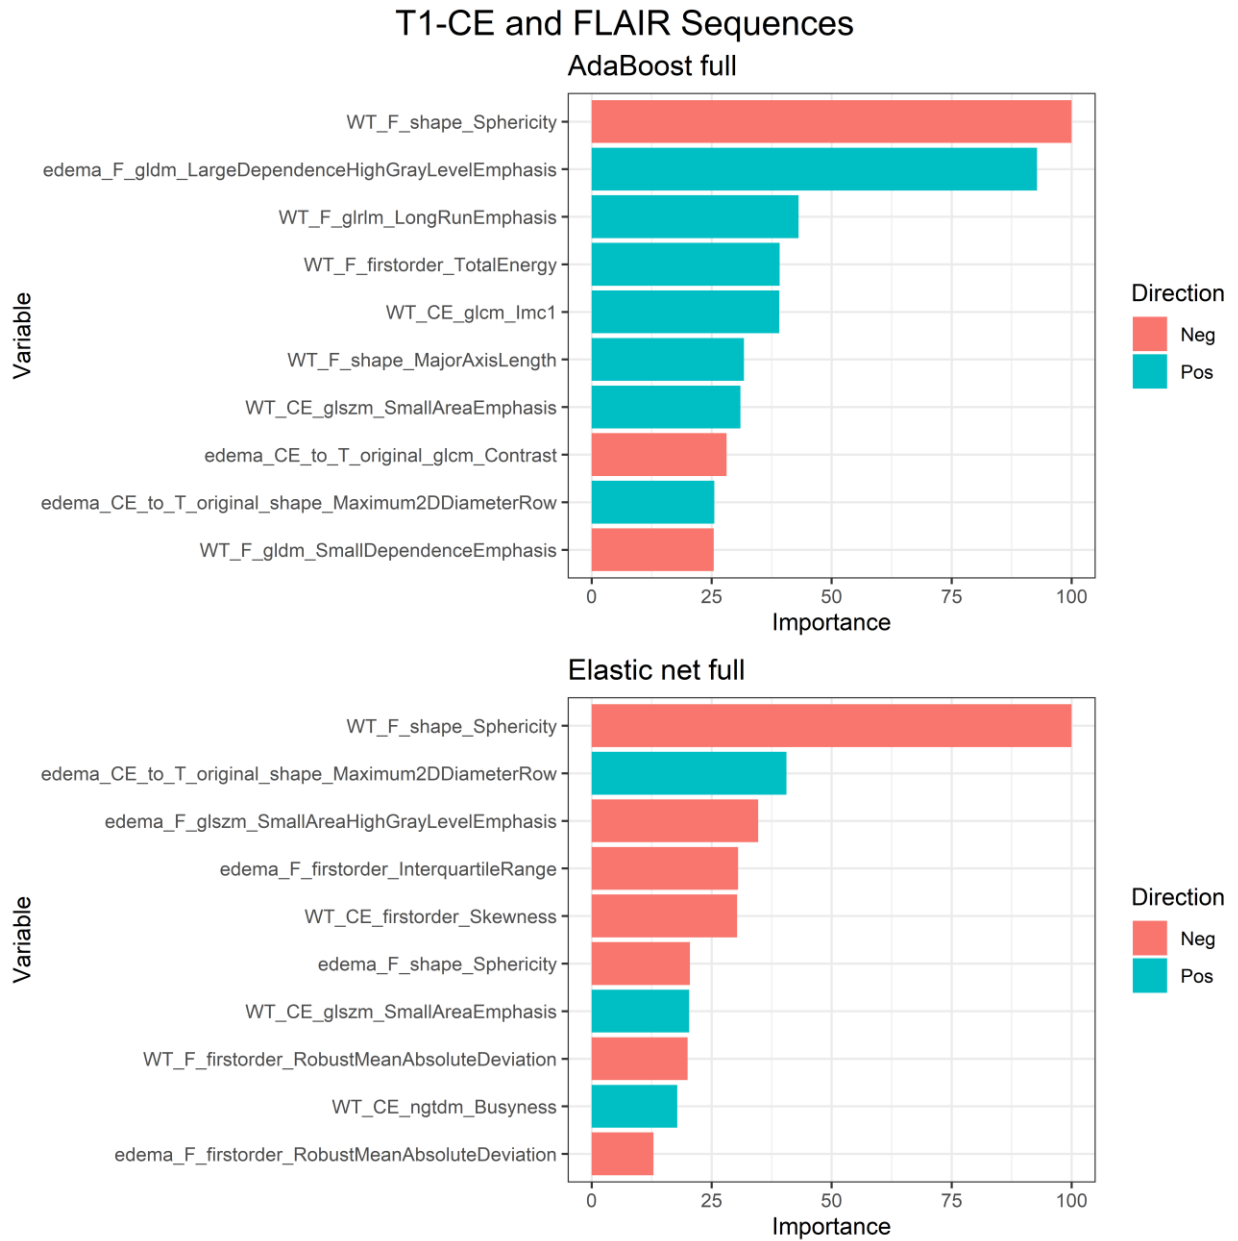

*Positive (Pos) association indicates that larger value of that feature is associated with GBM and a negative (Neg) value indicates that smaller values of that feature are associated with GBM (i.e. larger values are associated with metastasis).*

**Supplementary Figure 4: Heatmap for feature importance for multiparametric MRI models**

*Red (positive) is indicative that larger values are associated with Glioblastoma and the blue (negative) is indicative that smaller values are associated with Glioblastoma (i.e. larger values are associated with metastasis).*



# Variable Importance by Model/Feature Selection

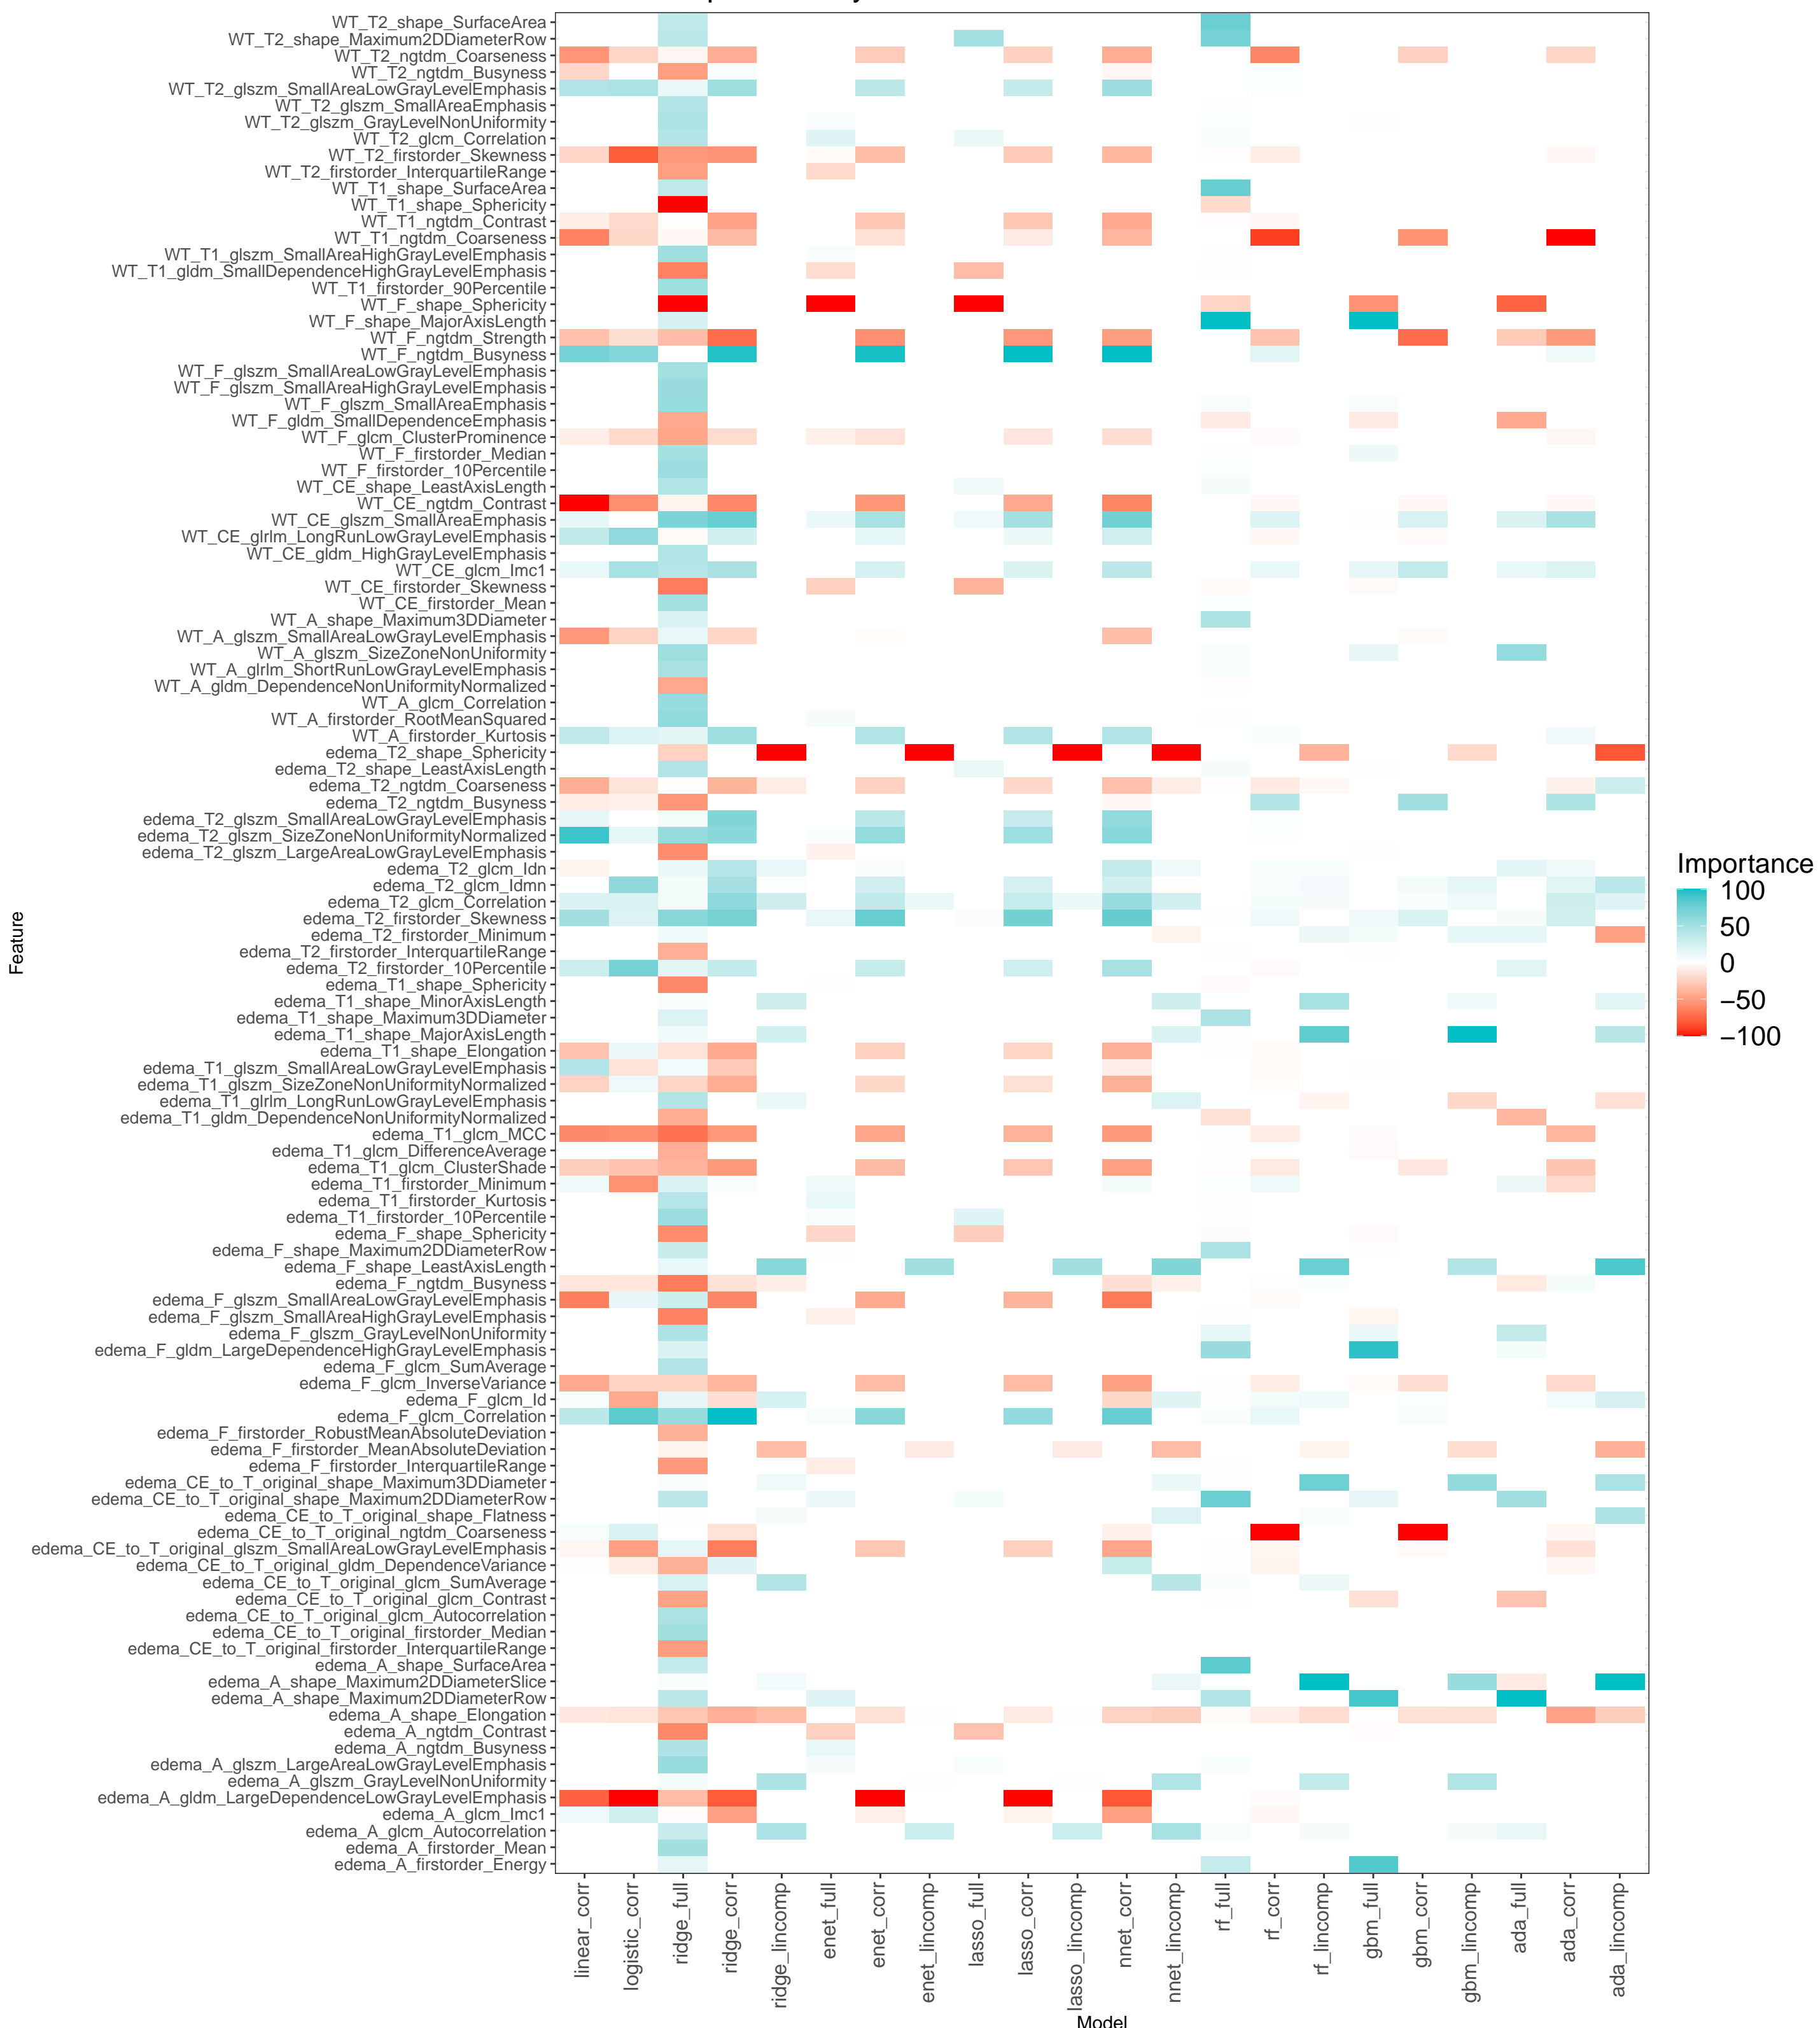

**Supplementary Table S4: Comparison with prior radiomic studies differentiating glioblastoma from metastatic brain lesions**

| Authors                            | Patients                                 | Scanner/sequences/Masks                                                     | Texture                                       | ML/DL                                                                                                     | Accuracy                                                                                                                                                                                         |
|------------------------------------|------------------------------------------|-----------------------------------------------------------------------------|-----------------------------------------------|-----------------------------------------------------------------------------------------------------------|--------------------------------------------------------------------------------------------------------------------------------------------------------------------------------------------------|
| <b>Priya et al (Current study)</b> | 120 (GBM-60, Metastasis 60)              | 1.5 T; volumetric 3D segmentation; whole tumor and edema mask;              | 107 radiomics features                        | 12 machine learning models and three feature selection methods                                            | LASSO (using full feature set); AUC 0.953                                                                                                                                                        |
| Dong et al 2020 <sup>1</sup>       | 120 (GBM-60, Metastasis 60)              | 1.5t/3t; 2-D; T1 CE, T2W, T1W; edema mask                                   | 321 features                                  | Boruta algorithm, 5 classifiers                                                                           | Highest accuracy (77%)- achieved after combining all 5 ML classifiers                                                                                                                            |
| Ortiz et al 2020 <sup>2</sup>      | 100 (GBM-50, Metastasis 50)              | 1.5T; 2-D; T1 CE coronal; only largest tumor segmented; enhancing mask      | 88 rotation invariant features                | 5 classifier models, 3 feature selection methods                                                          | MLP model- Accuracy (82%); AUC- 0.912                                                                                                                                                            |
| Bae et al 2020 <sup>3</sup>        | 248 (GBM-159, Metastasis 89)             | 3-T; 2-D; T1 CE; T2W; enhancing, edema masks, enhancing plus edema combined | 265                                           | 5 methods for feature selection; 7 machine learning classifiers; Deep learning- Deep neural network (DNN) | DNN- Highest accuracy from combined mask (89%); AUC (0.956);<br><br>Best ML model – from combined masks (adaptive boosting combined with tree-based feature selection- AUC- 0.890; Accuracy 83%) |
| Csutak et al 2020 <sup>4</sup>     | 42 (High grade glioma-16, Metastasis 26) | 1.5 T, T2W, peritumoral texture                                             | First, second order, wavelet texture features | Fisher selection method                                                                                   | Perc01 texture feature yielded highest AUC (0.858)                                                                                                                                               |
|                                    |                                          |                                                                             |                                               |                                                                                                           |                                                                                                                                                                                                  |

|                                      |                                               |                                                                                                           |                                                      |                                                                                               |                                                                                                         |
|--------------------------------------|-----------------------------------------------|-----------------------------------------------------------------------------------------------------------|------------------------------------------------------|-----------------------------------------------------------------------------------------------|---------------------------------------------------------------------------------------------------------|
| Tateishi et al 2020 <sup>5</sup>     | 126 (GBM-73, Metastasis 53)                   | 3T, T1CE, T2W, ADC                                                                                        | 36 Features                                          | SVM                                                                                           | AUC 0.920                                                                                               |
| Dastmalchian et al 2020 <sup>6</sup> | 31 (GBM-17, Low grade glioma-6, Metastasis-8) | 3T, T1 and T2 maps, MRI fingerprinting                                                                    | 39 Texture features                                  | Log rank test                                                                                 | AUC 0.877 (GBM versus metastasis)                                                                       |
| Artzi et al 2019 <sup>7</sup>        | 439 (GBM-212, IMD- 227)                       | 1.5T/3T; 2-D; T1 CE; Three tumor slices selected; enhancing mask                                          | First, Second-order, morphological, wavelet features | Supervised learning-4 ML classifiers- Unsupervised learning- Bag of features (BoF) extraction | Supervised-SVM- 85% (AUC-0.940) Unsupervised - BoF Accuracy- 75%                                        |
| Qian et al 2019 <sup>8</sup>         | 412 (GBM 242, Metastasis 170)                 | 3T; 2-D; T1 CE; volumetric segmentation                                                                   | 1303 radiomic features                               | 12 feature selection methods; 7 supervised machine-learning classifiers                       | LASSO-SVM- Accuracy- 83% (AUC 0.900)                                                                    |
| Zhang et al 2019 <sup>9</sup>        | 62 (GBM-36, Metastasis 26)                    | 3T; 2-D; ADC; largest cross-section only; whole tumor mask (enhancing plus necrotic); enhancing mask only | 5 GLCM parameters                                    | No                                                                                            | Whole tumor mask- AUC 0.682 (Homogeneity texture); enhancing only mask (AUC 0.886; Homogeneity texture) |
| Skogen et al 2019 <sup>10</sup>      | 43 (GBM-22, Metastasis 21)                    | 3T; 2-D; ADC, FA maps; largest cross-section only segmented;                                              | 5 first-order texture features at different filters  | No                                                                                            | FA plus ADC unfiltered image- AUC- 0.911                                                                |
| Petrujkić et al 2019 <sup>11</sup>   | 55 (GBM-30, Metastasis 25)                    | 3T, R2W, Susceptibility weighted imaging, T1 CE                                                           | Fractal and texture analysis                         | No                                                                                            | AUC 0.908                                                                                               |
| Mouthuy et al 2012 <sup>12</sup>     | 50 (GBM-41, Metastasis 14)                    | 1.5 T, peritumoral texture from washout phase of the perfusion sequence                                   | 9 texture features                                   | k-means clustering                                                                            | Highest AUC 0.75 from correlation texture                                                               |

|  |  |  |  |  |         |
|--|--|--|--|--|---------|
|  |  |  |  |  | feature |
|--|--|--|--|--|---------|

**ML- machine learning; DL: deep learning; LASSO: least absolute shrinkage and selection operator; SVM: support vector machine; MLP: multilayer perceptron; FA: fractional anisotropy**

**Supplementary Table S5: Typical scanning parameters for various sequences at the authors institute:**

**T1W** (TR/TE/TI: 1950/10/840, NEX: 2, slice thickness: 5 mm, matrix:  $320 \times 256$ , field of view (FOV) 240 mm, pixel size 0.75 mm)

**T2W** (TR/TE: 4000/90, NEX: 2, slice thickness: 5 mm, matrix:  $512 \times 408$ , FOV 240 mm, pixel size 0.5 mm);

**FLAIR** (TR/TE/TI: 9000/105/2500, NEX: 1, slice thickness: 5 mm, matrix:  $384 \times 308$ , FOV 240 mm, pixel size 0.6 mm)

**DWI** (TR/TE: 4000/74, NEX: 3, slice thickness: 5 mm, matrix:  $128 \times 128$ , FOV 240 mm, pixel size 1.8 mm)

**T1W-CE** (TR/TE/TI: 570/13, NEX: 2, slice thickness: 5 mm, matrix:  $384 \times 312$ , field of view (FOV) 240 mm, pixel size 0.62 mm)

T1 W contrast-enhanced images were acquired after administration of gadobenate dimeglumine (Multihance; Bayer Healthcare Pharma) or gadobutrol (Gadavist; Bayer Healthcare Pharma, Berlin, Germany) injected at the rate of 0.1 ml/kg body weight.

## References:

- 1 Dong, F. *et al.* Differentiation of supratentorial single brain metastasis and glioblastoma by using peri-enhancing oedema region-derived radiomic features and multiple classifiers. *European radiology* **30**, 3015-3022, doi:10.1007/s00330-019-06460-w (2020).
- 2 Ortiz-Ramón, R., Ruiz-España, S., Mollá-Olmos, E. & Moratal, D. Glioblastomas and brain metastases differentiation following an MRI texture analysis-based radiomics approach. *Physica medica : PM : an international journal devoted to the applications of physics to medicine and biology : official journal of the Italian Association of Biomedical Physics (AIFB)* **76**, 44-54, doi:10.1016/j.ejmp.2020.06.016 (2020).
- 3 Bae, S. *et al.* Robust performance of deep learning for distinguishing glioblastoma from single brain metastasis using radiomic features: model development and validation. *Scientific reports* **10**, 12110, doi:10.1038/s41598-020-68980-6 (2020).
- 4 Csutak, C. *et al.* Differentiating High-Grade Gliomas from Brain Metastases at Magnetic Resonance: The Role of Texture Analysis of the Peritumoral Zone. *Brain sciences* **10**, doi:10.3390/brainsci10090638 (2020).
- 5 Tateishi, M. *et al.* An initial experience of machine learning based on multi-sequence texture parameters in magnetic resonance imaging to differentiate glioblastoma from brain metastases. *Journal of the neurological sciences* **410**, 116514, doi:10.1016/j.jns.2019.116514 (2020).
- 6 Dastmalchian, S. *et al.* Radiomic analysis of magnetic resonance fingerprinting in adult brain tumors. *European journal of nuclear medicine and molecular imaging*, doi:10.1007/s00259-020-05037-w (2020).
- 7 Artzi, M., Bressler, I. & Ben Bashat, D. Differentiation between glioblastoma, brain metastasis and subtypes using radiomics analysis. *Journal of magnetic resonance imaging : JMRI* **50**, 519-528, doi:10.1002/jmri.26643 (2019).
- 8 Qian, Z. *et al.* Differentiation of glioblastoma from solitary brain metastases using radiomic machine-learning classifiers. *Cancer letters* **451**, 128-135, doi:10.1016/j.canlet.2019.02.054 (2019).
- 9 Zhang, G. *et al.* Discrimination Between Solitary Brain Metastasis and Glioblastoma Multiforme by Using ADC-Based Texture Analysis: A Comparison of Two Different ROI Placements. *Academic radiology* **26**, 1466-1472, doi:10.1016/j.acra.2019.01.010 (2019).
- 10 Skogen, K. *et al.* Texture analysis on diffusion tensor imaging: discriminating glioblastoma from single brain metastasis. *Acta radiologica (Stockholm, Sweden : 1987)* **60**, 356-366, doi:10.1177/0284185118780889 (2019).
- 11 Petrujkić, K. *et al.* Computational quantitative MR image features - a potential useful tool in differentiating glioblastoma from solitary brain metastasis. *European journal of radiology* **119**, 108634, doi:10.1016/j.ejrad.2019.08.003 (2019).
- 12 Mouthuy, N., Cosnard, G., Abarca-Quinones, J. & Michoux, N. Multiparametric magnetic resonance imaging to differentiate high-grade gliomas and brain metastases. *Journal of neuroradiology = Journal de neuroradiologie* **39**, 301-307, doi:10.1016/j.neurad.2011.11.002 (2012).
